# Supplementary material for: Clinical and laboratory predictors of death in African children with features of severe malaria: a systematic review and meta-analysis
Source: Springer Nature journal article supplement (doi:10.1186/s12916-017-0906-5), 2017-08-01
Supplement: MOESM2 [file 13348144]

**Domain 1: Patient selection**

**A. Risk of bias**

*Describe methods of patient selection:  
Children aged 18 months-12 years, with severe faciparum malaria(confirmed by blood film exam),all children had 1≥ feature: BCS≤2, parasitemia >100000/μL with 15%, or shock. Exclusion criteria: chloroquine treatment in last 4h, other causes of fever or altered consciousness (examination, blood/CSF culture)*

- Was a consecutive or random sample of patients enrolled? Yes
- Was a case-control design avoided? Yes
- Did the study avoid inappropriate exclusions? Yes

**Could the selection of patients have introduced bias? RISK: LOW**

**B. Concerns regarding applicability**

*Describe included patients (prior testing, presentation, intended use of index test and setting):  
See above*

**Is there concern that the included patients do not match the review question? CONCERN: HIGH**

**Domain 2a: Laboratory index tests: lactatemia and glycemia**

**A. Risk of bias**

*Describe the index test and how it was conducted and interpreted:  
Blood glucose level and packed cell volume measured immediately;baseline blood samples for assessment of glucose, lactate*

- Were the index test results interpreted without knowledge of the results of the reference standard? Yes
- Were the index test results collected prospectively? Yes
- Were the index test results established and reported using standardized clinical procedures and data collection tools? Yes

**Could the conduct or interpretation of the index test have introduced bias? RISK: LOW**

**B. Concerns regarding applicability**

**Is there concern that the index test, its conduct, or interpretation differ from the review question CONCERN: LOW**

## Domain 2b: Clinical index tests: coma score

### A. Risk of bias

*Describe the index test and how it was conducted and interpreted:*

*BCS $\leq$ 2 on admission; if a history of recent convulsion (<1 h before admission) or convulsion on admission, coma score evaluated 30 minutes after the last convulsion*

- Were the index test results interpreted without knowledge of the results of the reference standard? Yes
- Were the index test results collected prospectively? Yes
- Were the index test results established and reported using standardized clinical procedures and data collection tools? Yes

**Could the conduct or interpretation of the index test have introduced bias? RISK: LOW**

### B. Concerns regarding applicability

**Is there concern that the index test, its conduct, or interpretation differ from the review question? CONCERN: LOW**

## Domain 3: Reference standard

### A. Risk of bias

*Describe the reference standard and how it was conducted and interpreted:*

*Any reported death was considered to be a reference standard*

- Is the reference standard likely to correctly classify the target condition? Yes
- Were the reference standard results interpreted without knowledge of the results of the index test? Yes

**Could the reference standard, its conduct, or its interpretation have introduced bias? RISK: LOW**

### B. Concerns regarding applicability

**Is there concern that the target condition as defined by the reference standard does not match the review question? CONCERN: LOW**

## Domain 4: Flow and timing

### A. Risk of bias

*Describe any patients who did not receive the index test(s) and/or reference standard or who were excluded from the 2x2 table (refer to flow diagram):*

*One of excluded patients died immediately on arrival before receiving treatment*

*Describe the time interval and any interventions between index test(s) and reference standard:*

*Median time to death 18.5 h*

- Was there an appropriate interval between index test(s) and reference standard? Yes
- Did all patients receive a reference standard? Yes
- Did patients receive the same reference standard? Yes
- Were all patients included in the analysis? Yes

**Could the patient flow have introduced bias?**

**RISK: LOW**

**Domain 1: Patient selection**

**A. Risk of bias**

*Describe methods of patient selection:*

*All children with positive blood film for P. falciparum and 1 ≥ of clinical features: coma or prostration, hyperparasitemia, respiratory distress*

- Was a consecutive or random sample of patients enrolled? Yes
- Was a case-control design avoided? Yes
- Did the study avoid inappropriate exclusions? Yes

**Could the selection of patients have introduced bias? RISK: LOW**

**B. Concerns regarding applicability**

*Describe included patients (prior testing, presentation, intended use of index test and setting):*

*See above*

**Is there concern that the included patients do not match the review question? CONCERN: LOW**

**Domain 2a: Clinical index tests: respiratory distress, deep breathing, nasal flaring, indrawing**

**A. Risk of bias**

*Describe the index test and how it was conducted and interpreted:*

*On admission clinicians indicated on a checklist respiratory symptoms and signs, including signs such as: nasal flaring, indrawing, deep breathing or signs of pulmonary edema*

- Were the index test results interpreted without knowledge of the results of the reference standard? Yes
- Were the index test results collected prospectively? Yes
- Were the index test results established and reported using standardized clinical procedures and data collection tools? Yes

**Could the conduct or interpretation of the index test have introduced bias? RISK: UNCLEAR**

**B. Concerns regarding applicability**

**Is there concern that the index test, its conduct, or interpretation differ from the review question? CONCERN: LOW**

## Domain 2b: Laboratory index tests: acidosis

### A. Risk of bias

*Describe the index test and how it was conducted and interpreted:*

*Among all children with respiratory distress (119) an arterial blood gas sample was taken within 4h of admission in 61% of them; procedure not reported in case of other children*

- Were the index test results interpreted without knowledge of the results of the reference standard? Yes
- Were the index test results collected prospectively? Yes
- Were the index test results established and reported using standardized clinical procedures and data collection tools? Yes

**Could the conduct or interpretation of the index test have introduced bias?**

**RISK: LOW**

### B. Concerns regarding applicability

**Is there concern that the index test, its conduct, or interpretation differ from the review question?**

**CONCERN: LOW**

## Domain 3: Reference standard

### A. Risk of bias

*Describe the reference standard and how it was conducted and interpreted:*

*Any reported death was considered to be a reference standard*

- Is the reference standard likely to correctly classify the target condition? Yes
- Were the reference standard results interpreted without knowledge of the results of the index test? Yes

**Could the reference standard, its conduct, or its interpretation have introduced bias?**

**RISK: LOW**

### B. Concerns regarding applicability

**Is there concern that the target condition as defined by the reference standard does not match the review question?**

**CONCERN: LOW**

## Domain 4: Flow and timing

### A. Risk of bias

*Describe any patients who did not receive the index test(s) and/or reference standard or who were excluded from the 2x2 table (refer to flow diagram):*

*Children admitted in critical condition who died before the admission; other excluded if historical data or investigation indicated on presence of another significant pathology: lobar pneumonia on CXR, septicemia, meningitis, accidental poisoning, congenital heart, renal disease, preceding developmental delay, epilepsy*

*Describe the time interval and any interventions between index test(s) and reference standard:*

*NR*

- Was there an appropriate interval between index test(s) and reference standard? Yes
- Did all patients receive a reference standard? Yes
- Did patients receive the same reference standard? Yes
- Were all patients included in the analysis? Yes

**Could the patient flow have introduced bias?**

**RISK: LOW**



**Domain 1: Patient selection**

**A. Risk of bias**

*Describe methods of patient selection:*  
 All children with positive blood film for *P. falciparum* and 1≥ of clinical features: coma or prostration, hyperparasitemia, respiratory distress

- Was a consecutive or random sample of patients enrolled? Yes
- Was a case-control design avoided? Yes
- Did the study avoid inappropriate exclusions? No

**Could the selection of patients have introduced bias? RISK: HIGH**

**B. Concerns regarding applicability**

*Describe included patients (prior testing, presentation, intended use of index test and setting):*  
 See above

**Is there concern that the included patients do not match the review question? CONCERN: UNCLEAR**

**Domain 2: Clinical index test**

**A. Risk of bias**

*Describe the index test and how it was conducted and interpreted:*  
 BCS <3 at least 30 min after the last seizure, at least 6 h after diazepam treatment and treatment of hypoglycemia if appropriate

- Were the index test results interpreted without knowledge of the results of the reference standard? Yes
- Were the index test results collected prospectively? Yes
- Were the index test results established and reported using standardized clinical procedures and data collection tools? Yes
- If a threshold was used was it pre-specified? Yes

**Could the conduct or interpretation of the index test have introduced bias? RISK:LOW**

**B. Concerns regarding applicability**

**Is there concern that the index test, its conduct, or interpretation differ from the review question? CONCERN:HIGH**



### Domain 3: Reference standard

#### A. Risk of bias

*Describe the reference standard and how it was conducted and interpreted:*

*Any reported death was considered to be a reference standard*

- Is the reference standard likely to correctly classify the target condition? Yes
- Were the reference standard results interpreted without knowledge of the results of the index test? Yes

**Could the reference standard, its conduct, or its interpretation have introduced bias?**

#### B. Concerns regarding applicability

**RISK: LOW**

**Is there concern that the target condition as defined by the reference standard does not match the review question?**

**CONCERN: LOW**

### Domain 4: Flow and timing

#### A. Risk of bias

*Describe any patients who did not receive the index test(s) and/or reference standard or who were excluded from the 2x2 table (refer to flow diagram):*

*Children admitted in critical condition who died before the admission; other excluded if historical data or investigation indicated on presence of another significant pathology: lobar pneumonia on CXR, septicemia, meningitis, accidental poisoning, congenital heart, renal disease, preceding developmental delay, epilepsy*

*Describe the time interval and any interventions between index test(s) and reference standard:*

*NR*

- Was there an appropriate interval between index test(s) and reference standard? Yes
- Did all patients receive a reference standard? Yes
- Did patients receive the same reference standard? Yes
- Were all patients included in the analysis? Yes

**Could the patient flow have introduced bias?**

**RISK: LOW**

**Domain 1: Patient selection**

**A. Risk of bias**

*Describe methods of patient selection:*  
 All children with severe malaria according to WHO definition (1995)

- Was a consecutive or random sample of patients enrolled? Yes
- Was a case-control design avoided? Yes
- Did the study avoid inappropriate exclusions? Yes

**Could the selection of patients have introduced bias? RISK: LOW**

**B. Concerns regarding applicability**

*Describe included patients (prior testing, presentation, intended use of index test and setting):*  
 See above

**Is there concern that the included patients do not match the review question? CONCERN: LOW**

**Domain 2: Clinical index tests**

**A. Risk of bias**

*Describe the index test and how it was conducted and interpreted:*  
 No fixed coma score applied, instead impaired consciousness: children who wake up upon a stimulus, but fall asleep immediately, coma: more severe than impaired consciousness. Respiratory distress: any cause other than anemia, possible causes: convulsive crises, accidental drugs inhalation, acute pulmonary edema, respiratory infections, failure of automatic control of breathing

- Were the index test results interpreted without knowledge of the results of the reference standard? Yes
- Were the index test results collected prospectively? Yes
- Were the index test results established and reported using standardized clinical procedures and data collection tools? Unclear

**Could the conduct or interpretation of the index test have introduced bias? RISK:HIGH**

**B. Concerns regarding applicability**

**Is there concern that the index test, its conduct, or interpretation differ from the review question? CONCERN:HIGH**

## Domain 2b: Laboratory index tests

### A. Risk of bias

*Describe the index test and how it was conducted and interpreted:*  
NR

- Were the index test results interpreted without knowledge of the results of the reference standard? Yes
- Were the index test results collected prospectively? Yes
- Were the index test results established and reported using standardized clinical procedures and data collection tools? Unclear
- If a threshold was used was it pre-specified? No

Could the conduct or interpretation of the index test have introduced bias?

**RISK: HIGH**

### B. Concerns regarding applicability

Is there concern that the index test, its conduct, or interpretation differ from the review question?

**CONCERN: HIGH**

## Domain 3: Reference standard

### A. Risk of bias

*Describe the reference standard and how it was conducted and interpreted:*  
Any reported death was considered to be a reference standard

- Is the reference standard likely to correctly classify the target condition? Yes
- Were the reference standard results interpreted without knowledge of the results of the index test? Yes

Could the reference standard, its conduct, or its interpretation have introduced bias?

**RISK: LOW**

#### a. Concerns regarding applicability

Is there concern that the target condition as defined by the reference standard does not match the review question?

**CONCERN: LOW**

## Domain 4: Flow and timing

### a. Risk of bias

*Describe any patients who did not receive the index test(s) and/or reference standard or who were excluded from the 2x2 table (refer to flow diagram):*

*No excluded patients reported*

*Describe the time interval and any interventions between index test(s) and reference standard:*

*NR*

- Was there an appropriate interval between index test(s) and reference standard? Yes
- Did all patients receive a reference standard? Yes
- Did patients receive the same reference standard? Yes
- Were all patients included in the analysis? Yes

**Could the patient flow have introduced bias?**

**RISK: LOW**

**Domain 1: Patient selection**

**A. Risk of bias**

*Describe methods of patient selection:*

*Children aged 6 months-15 years. Inclusion criteria: P. falciparum in the thick blood film and 1 ≥ of following conditions: prostration, coma, hypoglycemia, repeated generalized convulsions, pulmonary edema/respiratory distress, spontaneous bleeding, renal failure, severe anemia*

- Was a consecutive or random sample of patients enrolled? Yes
- Was a case-control design avoided? Yes
- Did the study avoid inappropriate exclusions? Yes

**Could the selection of patients have introduced bias? RISK: LOW**

**B. Concerns regarding applicability**

*Describe included patients (prior testing, presentation, intended use of index test and setting):  
See above*

**Is there concern that the included patients do not match the review question? CONCERN: LOW**

**Domain 2a: Clinical index tests**

**A. Risk of bias**

*Describe the index test and how it was conducted and interpreted:*

*Convulsions: >2 in last 24h, coma (BCS<2). No details on respiratory distress/pulmonary edema*

- Were the index test results interpreted without knowledge of the results of the reference standard? Yes
- Were the index test results collected prospectively? Yes
- Were the index test results established and reported using standardized clinical procedures and data collection tools? Unclear

**Could the conduct or interpretation of the index test have introduced bias? RISK:UNCLEAR**

**B. Concerns regarding applicability**

**Is there concern that the index test, its conduct, or interpretation differ from the review question? CONCERN:UNCLEAR**

## Domain 2b: Laboratory index tests

### A. Risk of bias

*Describe the index test and how it was conducted and interpreted:  
Blood sample drawn on admission*

- Were the index test results interpreted without knowledge of the results of the reference standard? Yes
- Were the index test results collected prospectively? Yes
- Were the index test results established and reported using standardized clinical procedures and data collection tools? Yes
- If a threshold was used was it pre-specified? Yes

**Could the conduct or interpretation of the index test have introduced bias?**

**RISK:LOW**

### B. Concerns regarding applicability

**Is there concern that the index test, its conduct, or interpretation differ from the review question? CONCERN: LOW**

## Domain 3: Reference standard

### A. Risk of bias

*Describe the reference standard and how it was conducted and interpreted:  
Any reported death was considered to be a reference standard*

- Is the reference standard likely to correctly classify the target condition? Yes
- Were the reference standard results interpreted without knowledge of the results of the index test? Yes

**Could the reference standard, its conduct, or its interpretation have introduced bias?**

**RISK: LOW**

### B. Concerns regarding applicability

**Is there concern that the target condition as defined by the reference standard does not match the review question?**

**CONCERN: LOW**

## Domain 4: Flow and timing

### A. Risk of bias

*Describe any patients who did not receive the index test(s) and/or reference standard or who were excluded from the 2x2 table (refer to flow diagram):*

*Excluded: patients with unknown outcome (14%)*

*Describe the time interval and any interventions between index test(s) and reference standard:*

*NR*

- Was there an appropriate interval between index test(s) and reference standard? Yes
- Did all patients receive a reference standard? Yes
- Did patients receive the same reference standard? Yes
- Were all patients included in the analysis? Yes

**Could the patient flow have introduced bias?**

**RISK: LOW**

**Domain 1: Patient selection**

**A. Risk of bias**

*Describe methods of patient selection:  
Children aged 6-72 months with cerebral malaria and other forms of severe malaria based on WHO definition (1990) and confirmed by parasitemia*

- Was a consecutive or random sample of patients enrolled? Yes
- Was a case-control design avoided? Yes
- Did the study avoid inappropriate exclusions? No

**Could the selection of patients have introduced bias? RISK: HIGH**

**B. Concerns regarding applicability**

*Describe included patients (prior testing, presentation, intended use of index test and setting):  
See above*

**Is there concern that the included patients do not match the review question? CONCERN: LOW**

**Domain 2: Clinical index tests**

**A. Risk of bias**

*Describe the index test and how it was conducted and interpreted:  
Conducted on admission, recorded on standardized forms; coma (BCS<4) interpreted as unable to localize painful stimulus; no precise definition regarding number of convulsions*

- Were the index test results interpreted without knowledge of the results of the reference standard? • Yes
- Were the index test results collected prospectively? • Yes
- Were the index test results established and reported using standardized clinical procedures and data collection tools? • Yes

**Could the conduct or interpretation of the index test have introduced bias? RISK:LOW**

**B. Concerns regarding applicability**

**Is there concern that the index test, its conduct, or interpretation differ from the review question? CONCERN:LOW**



### Domain 3: Reference standard

#### A. Risk of bias

*Describe the reference standard and how it was conducted and interpreted:*

*Any reported death was considered to be a reference standard*

- Is the reference standard likely to correctly classify the target condition? Yes
- Were the reference standard results interpreted without knowledge of the results of the index test? Yes

**Could the reference standard, its conduct, or its interpretation have introduced bias?**

**RISK: LOW**

#### B. Concerns regarding applicability

**Is there concern that the target condition as defined by the reference standard does not match the review question?**

**CONCERN: LOW**

### Domain 4: Flow and timing

#### A. Risk of bias

*Describe any patients who did not receive the index test(s) and/or reference standard or who were excluded from the 2x2 table (refer to flow diagram):*

*Excluded: 6 patients with neurological sequelae by discharge;*

*Describe the time interval and any interventions between index test(s) and reference standard:*

*Mean time before death: 20.5 h*

- Was there an appropriate interval between index test(s) and reference standard? Yes
- Did all patients receive a reference standard? Yes
- Did patients receive the same reference standard? Yes
- Were all patients included in the analysis? Yes

**Could the patient flow have introduced bias?**

**RISK: LOW**

**Domain 1: Patient selection**

**A. Risk of bias**

*Describe methods of patient selection:*

*All children (0-15 years old) with clinical signs of malaria and a P.falciparum-positive thick blood film; presence of WHO severity criteria or respiratory distress documented by a physician on ad hoc designed forms; pediatric department*

- Was a consecutive or random sample of patients enrolled? Yes
- Was a case-control design avoided? Yes
- Did the study avoid inappropriate exclusions? Yes

**Could the selection of patients have introduced bias? RISK: LOW**

**B. Concerns regarding applicability**

*Describe included patients (prior testing, presentation, intended use of index test and setting):  
See above*

**Is there concern that the included patients do not match the review question? CONCERN: LOW**

**Domain 2: Laboratory index test**

**A. Risk of bias**

*Describe the index test and how it was conducted and interpreted:*

*Blood sample drawn on admission, definition: platelet count < 100 000/mm<sup>3</sup>*

- Were the index test results interpreted without knowledge of the results of the reference standard? Yes
- Were the index test results collected prospectively? Yes
- Were the index test results established and reported using standardized clinical procedures and data collection tools? Yes
- If a threshold was used was it pre-specified? Yes

**Could the conduct or interpretation of the index test have introduced bias? RISK: LOW**

**B. Concerns regarding applicability**

**Is there concern that the index test, its conduct, or interpretation differ from the review question? CONCERN:LOW**

### Domain 3: Reference standard

#### A. Risk of bias

*Describe the reference standard and how it was conducted and interpreted:*

*Any reported death was considered to be a reference standard*

- Is the reference standard likely to correctly classify the target condition? Yes
- Were the reference standard results interpreted without knowledge of the results of the index test? Yes

**Could the reference standard, its conduct, or its interpretation have introduced bias?**

#### B. Concerns regarding applicability

**RISK: LOW**

**Is there concern that the target condition as defined by the reference standard does not match the review question?**

**CONCERN: LOW**

### Domain 4: Flow and timing

#### A. Risk of bias

*Describe any patients who did not receive the index test(s) and/or reference standard or who were excluded from the 2x2 table (refer to flow diagram):*

*None*

*Describe the time interval and any interventions between index test(s) and reference standard:*

*NR*

- Was there an appropriate interval between index test(s) and reference standard? Yes
- Did all patients receive a reference standard? Yes
- Did patients receive the same reference standard? Yes
- Were all patients included in the analysis? Yes

**Could the patient flow have introduced bias?**

**RISK: LOW**

**Domain 1: Patient selection**

**A. Risk of bias**

*Describe methods of patient selection:*

*All patients admitted to pediatric department with severe malaria (based on 1990 and 2000 WHO definition);*

- Was a consecutive or random sample of patients enrolled? Yes
- Was a case-control design avoided? Yes
- Did the study avoid inappropriate exclusions? Yes

**Could the selection of patients have introduced bias? RISK: LOW**

**B. Concerns regarding applicability**

*Describe included patients (prior testing, presentation, intended use of index test and setting):*

*See above*

**Is there concern that the included patients do not match the review question? CONCERN: LOW**

**Domain 2a: Clinical index tests**

**A. Risk of bias**

*Describe the index test and how it was conducted and interpreted:*

*Conducted during the first 24 h of hospitalisation, level of consciousness evaluated using BCS or GCS, WHO severe malaria or respiratory distress reported systematically by one physician*

- Were the index test results interpreted without knowledge of the results of the reference standard? Yes
- Were the index test results collected prospectively? Yes
- Were the index test results established and reported using standardized clinical procedures and data collection tools? Yes

**Could the conduct or interpretation of the index test have introduced bias? RISK:LOW**

**B. Concerns regarding applicability**

**Is there concern that the index test, its conduct, or interpretation differ from the review question? CONCERN:LOW**

## Domain 2b: Laboratory index tests

### A. Risk of bias

*Describe the index test and how it was conducted and interpreted:  
Blood sample drawn within the first 24 h of hospitalisation*

- Were the index test results interpreted without knowledge of the results of the reference standard? Yes
- Were the index test results collected prospectively? Yes
- Were the index test results established and reported using standardized clinical procedures and data collection tools? Yes
- If a threshold was used was it pre-specified? Yes

**Could the conduct or interpretation of the index test have introduced bias?**

**RISK:LOW**

### B. Concerns regarding applicability

**Is there concern that the index test, its conduct, or interpretation differ from the review question?**

**CONCERN: LOW**

## Domain 3: Reference standard

### A. Risk of bias

*Describe the reference standard and how it was conducted and interpreted:  
Any reported death was considered to be a reference standard*

- Is the reference standard likely to correctly classify the target condition? Yes
- Were the reference standard results interpreted without knowledge of the results of the index test? Yes

**Could the reference standard, its conduct, or its interpretation have introduced bias?**

**RISK: LOW**

### B. Concerns regarding applicability

**Is there concern that the target condition as defined by the reference standard does not match the review question?**

**CONCERN: LOW**

## Domain 4: Flow and timing

### A. Risk of bias

*Describe any patients who did not receive the index test(s) and/or reference standard or who were excluded from the 2x2 table (refer to flow diagram):*

*286/316 (91%) patients tested for thrombocytopenia, otherwise no further exclusions*

*Describe the time interval and any interventions between index test(s) and reference standard:*

*NR*

- Was there an appropriate interval between index test(s) and reference standard? Yes
- Did all patients receive a reference standard? Yes
- Did patients receive the same reference standard? Yes
- Were all patients included in the analysis? Yes

**Could the patient flow have introduced bias?**

**RISK: LOW**

**Domain 1: Patient selection**

**A. Risk of bias**

*Describe methods of patient selection:  
children admitted to high-dependency unit by medically qualified members, who completed standard admission questionnaire and examination*

- Was a consecutive or random sample of patients enrolled? Yes
- Was a case-control design avoided? Yes
- Did the study avoid inappropriate exclusions? Yes

**Could the selection of patients have introduced bias? RISK: LOW**

**B. Concerns regarding applicability**

*Describe included patients (prior testing, presentation, intended use of index test and setting):  
Patients with blood-film-positive P.falciparum with 1≥ of following features: prostration, coma, prolonged or recurrent seizures, respiratory distress, circulatory collapse, anemia, jaundice*

**Is there concern that the included patients do not match the review question? CONCERN: LOW**

**Domain 2a: Clinical index tests**

**A. Risk of bias**

*Describe the index test and how it was conducted and interpreted:  
prostration inability to sit or breast feed, impaired consciousness: prostration or BCS≤2, circulatory collapse: shock score ≥2*

- Were the index test results interpreted without knowledge of the results of the reference standard? Yes
- Were the index test results collected prospectively? Yes
- Were the index test results established and reported using standardized clinical procedures and data collection tools? Yes

**Could the conduct or interpretation of the index test have introduced bias? RISK:LOW**

**B. Concerns regarding applicability**

**Is there concern that the index test, its conduct, or interpretation differ from the review question? CONCERN: LOW**

## Domain 2b: Laboratory index tests: anemia, hypoglycemia, renal failure

### A. Risk of bias

*Describe the index test and how it was conducted and interpreted:*

*Acidosis: BE <-8 and/or deep breathing, anemia: hemoglobin <5 g/dL*

- Were the index test results interpreted without knowledge of the results of the reference standard? Yes
- Were the index test results collected prospectively? Yes
- Were the index test results established and reported using standardized clinical procedures and data collection tools? Yes
- If a threshold was used was it pre-specified? Yes

**Could the conduct or interpretation of the index test have introduced bias?**

**RISK:LOW**

### B. Concerns regarding applicability

**Is there concern that the index test, its conduct, or interpretation differ from the review question?** **CONCERN: UNCLEAR**

## Domain 3: Reference standard

### A. Risk of bias

*Describe the reference standard and how it was conducted and interpreted:*

*Any reported death was considered to be a reference standard*

- Is the reference standard likely to correctly classify the target condition? Yes
- Were the reference standard results interpreted without knowledge of the results of the index test? Yes

**Could the reference standard, its conduct, or its interpretation have introduced bias?**

**RISK: LOW**

### B. Concerns regarding applicability

**Is there concern that the target condition as defined by the reference standard does not match the review question?**

**CONCERN: LOW**



## Domain 4: Flow and timing

### A. Risk of bias

*Describe any patients who did not receive the index test(s) and/or reference standard or who were excluded from the 2x2 table (refer to flow diagram):*

*No excluded patients*

*Describe the time interval and any interventions between index test(s) and reference standard:*

*NR*

- Was there an appropriate interval between index test(s) and reference standard? Yes
- Did all patients receive a reference standard? Yes
- Did patients receive the same reference standard? Yes
- Were all patients included in the analysis? Yes

**Could the patient flow have introduced bias?**

**RISK: LOW**

**Domain 1: Patient selection**

**A. Risk of bias**

*Describe methods of patient selection:  
Children aged 6 months to 9 years with signs of severe malaria were examined by one of the authors*

- Was a consecutive or random sample of patients enrolled? Yes
- Was a case-control design avoided? Yes
- Did the study avoid inappropriate exclusions? Yes

**Could the selection of patients have introduced bias? RISK: LOW**

**B. Concerns regarding applicability**

*Describe included patients (prior testing, presentation, intended use of index test and setting):  
asexual P.falciparum parasitemia, and ≤1 of the following WHO (2000) criteria: severe anemia, prostration, respiratory distress, multiple convulsions, impaired consciousness, hemoglobinuria, clinical jaundice, circulatory collapse, abnormal bleeding, pulmonary edema*

**Is there concern that the included patients do not match the review question? CONCERN: LOW**

**Domain 2a: Clinical index tests**

**A. Risk of bias**

*Describe the index test and how it was conducted and interpreted:  
prostration: inability to sit or eat, respiratory distress: nasal flaring or Kussmaul breathing or subcostal recession, convulsions: history within preceding 24 h and one directly observed, impaired consciousness: BSC≤4, hemoglobinuria: dipstick, circulatory collapse: SBP<60 mmHg in ≤5 years old children, SBP<80 mmHg in > 5 years old children, hyperpyrexia: >40°C*

- Were the index test results interpreted without knowledge of the results of the reference standard? Yes
- Were the index test results collected prospectively? Yes
- Were the index test results established and reported using standardized clinical procedures and data collection tools? Unclear

**Could the conduct or interpretation of the index test have introduced bias? RISK:LOW**

**B. Concerns regarding applicability**

**Is there concern that the index test, its conduct, or interpretation differ from the review question? CONCERN: LOW**

## Domain 2b: Laboratory index tests: anemia, hypoglycemia, renal failure

### A. Risk of bias

*Describe the index test and how it was conducted and interpreted:*

*Anemia: Hb<5g/dL, hypoglycemia< 2.2mmol/L, hyperlactatemia≥5 mmol/L*

- Were the index test results interpreted without knowledge of the results of the reference standard? Yes
- Were the index test results collected prospectively? Yes
- Were the index test results established and reported using standardized clinical procedures and data collection tools? Unclear
- If a threshold was used was it pre-specified? Yes

**Could the conduct or interpretation of the index test have introduced bias?**

**RISK:LOW**

### B. Concerns regarding applicability

**Is there concern that the index test, its conduct, or interpretation differ from the review question?**

**CONCERN: LOW**

## Domain 3: Reference standard

### A. Risk of bias

*Describe the reference standard and how it was conducted and interpreted:*

*Any reported death was considered to be a reference standard*

- Is the reference standard likely to correctly classify the target condition? Yes
- Were the reference standard results interpreted without knowledge of the results of the index test? Yes

**Could the reference standard, its conduct, or its interpretation have introduced bias?**

**RISK: LOW**

### B. Concerns regarding applicability

**Is there concern that the target condition as defined by the reference standard does not match the review question?**

**CONCERN: LOW**

## Domain 4: Flow and timing

### A. Risk of bias

*Describe any patients who did not receive the index test(s) and/or reference standard or who were excluded from the 2x2 table (refer to flow diagram):*

*5 patients dropped out of the study*

*Describe the time interval and any interventions between index test(s) and reference standard:*

*Twenty children died in 24 hours, seven children within 24-48 hours, five children within 48-72 hours following hospitalization*

- Was there an appropriate interval between index test(s) and reference standard? Yes
- Did all patients receive a reference standard? Yes
- Did patients receive the same reference standard? Yes
- Were all patients included in the analysis? Yes

**Could the patient flow have introduced bias?**

**RISK: LOW**

**Domain 1: Patient selection**

**A. Risk of bias**

*Describe methods of patient selection:*

*Febrile children (or those with history of fever in the last 48 hours), aged 0-10 years of age, >2 asexual forms of P. falciparum on blood film and one or more of the following features: BCS≤2, convulsions, hyperlactatemia, hypoglycemia, severe anaemia; seen on admission by a clinician, summary data recorded on a pro-forma sheet*

- Was a consecutive or random sample of patients enrolled? Yes
- Was a case-control design avoided? Yes
- Did the study avoid inappropriate exclusions? No

**Could the selection of patients have introduced bias? RISK: LOW**

**B. Concerns regarding applicability**

*Describe included patients (prior testing, presentation, intended use of index test and setting):  
See above*

**Is there concern that the included patients do not match the review question? CONCERN: LOW**

**Domain 2a: Clinical index tests**

**A. Risk of bias**

*Describe the index test and how it was conducted and interpreted:*

*Cerebral malaria: BCS≤2, convulsions: 3≥ in 24 h, respiratory distress: abnormalities in RR or rhythm or signs of dsitress such as nasal flaring, intercostal or subcostal recession*

- Were the index test results interpreted without knowledge of the results of the reference standard? Yes
- Were the index test results collected prospectively? Yes
- Were the index test results established and reported using standarized clinical procedures and data collection tools? Yes

**Could the conduct or interpretation of the index test have introduced bias? RISK:LOW**

**B. Concerns regarding applicability**

**Is there concern that the index test, its conduct, or interpretation differ from the review question? CONCERN: LOW**

## Domain 2b: Laboratory index tests

### A. Risk of bias

*Describe the index test and how it was conducted and interpreted:*

*Lactate and glucose measured within 15 minutes of blood sampling; anemia: Hb<5g/dL, hypoglycemia<2.2mmol/L, hyperlactatemia≥5 mmol/L*

- Were the index test results interpreted without knowledge of the results of the reference standard? Yes
- Were the index test results collected prospectively? Yes
- Were the index test results established and reported using standardized clinical procedures and data collection tools? Yes
- If a threshold was used was it pre-specified? Yes

**Could the conduct or interpretation of the index test have introduced bias?**

**RISK:LOW**

### B. Concerns regarding applicability

**Is there concern that the index test, its conduct, or interpretation differ from the review question? CONCERN: LOW**

## Domain 3: Reference standard

### A. Risk of bias

*Describe the reference standard and how it was conducted and interpreted:*

*Any reported death was considered to be a reference standard*

- Is the reference standard likely to correctly classify the target condition? Yes
- Were the reference standard results interpreted without knowledge of the results of the index test? Yes

**Could the reference standard, its conduct, or its interpretation have introduced bias?**

**RISK: LOW**

### B. Concerns regarding applicability

**Is there concern that the target condition as defined by the reference standard does not match the review question?**

**CONCERN: LOW**

## Domain 4: Flow and timing

### A. Risk of bias

*Describe any patients who did not receive the index test(s) and/or reference standard or who were excluded from the 2x2 table (refer to flow diagram):*

*7 children lost to follow-up, 463/576 (80%) of children with available blood lactate measure*

*Describe the time interval and any interventions between index test(s) and reference standard:*

*90% of deaths within the first 24 h following admission*

- Was there an appropriate interval between index test(s) and reference standard? Yes
- Did all patients receive a reference standard? Yes
- Did patients receive the same reference standard? Yes
- Were all patients included in the analysis? Yes

**Could the patient flow have introduced bias?**

**RISK: LOW**

**Domain 1: Patient selection**

**A. Risk of bias**

*Describe methods of patient selection:*

*Children aged 3 months to 5 years with suspicion of malaria, admitted to paediatric ward, clinical examination by doctor or medical student in final year*

- Was a consecutive or random sample of patients enrolled? Yes
- Was a case-control design avoided? Yes
- Did the study avoid inappropriate exclusions? No

**Could the selection of patients have introduced bias? RISK: HIGH**

**B. Concerns regarding applicability**

*Describe included patients (prior testing, presentation, intended use of index test and setting):*

*P.falciparum and at least one of the following clinical or biological criteria;coma, impaired consciousness, repeated convulsions, prostration, respiratory distress, jaundice, metabolic acidosis, sevre anaemia, hyperparasitemia, microscopic haemoglobinuria, renal failure, collapse, abonormal bleeding or pulmonary odema*

**Is there concern that the included patients do not match the review question? CONCERN: HIGH**

**Domain 2a: Clinical index tests**

**A. Risk of bias**

*Describe the index test and how it was conducted and interpreted:*

*coma (BCS≤2), impaired consciousness (BCS >2 and <5); no description of other index tests*

- Were the index test results interpreted without knowledge of the results of the reference standard? Yes
- Were the index test results collected prospectively? Yes
- Were the index test results established and reported using standardized clinical procedures and data collection tools? Unclear

**Could the conduct or interpretation of the index test have introduced bias? RISK:UNCLEAR**

**B. Concerns regarding applicability**

**Is there concern that the index test, its conduct, or interpretation differ from the review question? CONCERN: UNCLEAR**



## Domain 2b: Laboratory index tests

### A. Risk of bias

*Describe the index test and how it was conducted and interpreted:*

*Anaemia: Hb<5g/dL, hypoglycemia: blood glucose< 2.2 mmol/L, parasitemi>4 %*

- Were the index test results interpreted without knowledge of the results of the reference standard? Yes
- Were the index test results collected prospectively? Yes
- Were the index test results established and reported using standardized clinical procedures and data collection tools? Unclear
- If a threshold was used was it pre-specified? Yes

**Could the conduct or interpretation of the index test have introduced bias?**

**RISK:LOW**

### B. Concerns regarding applicability

**Is there concern that the index test, its conduct, or interpretation differ from the review question?**

**CONCERN: LOW**

## Domain 3: Reference standard

### B. Risk of bias

*Describe the reference standard and how it was conducted and interpreted:*

*Any reported death was considered to be a reference standard*

- Is the reference standard likely to correctly classify the target condition? Yes
- Were the reference standard results interpreted without knowledge of the results of the index test? Yes

**Could the reference standard, its conduct, or its interpretation have introduced bias?**

**RISK: LOW**

### C. Concerns regarding applicability

**Is there concern that the target condition as defined by the reference standard does not match the review question?**

**CONCERN: LOW**

## Domain 4: Flow and timing

### A. Risk of bias

*Describe any patients who did not receive the index test(s) and/or reference standard or who were excluded from the 2x2 table (refer to flow diagram):*

*No excluded patients*

*Describe the time interval and any interventions between index test(s) and reference standard:*

*NR*

- Was there an appropriate interval between index test(s) and reference standard? Yes
- Did all patients receive a reference standard? Yes
- Did patients receive the same reference standard? Yes
- Were all patients included in the analysis? Yes

**Could the patient flow have introduced bias?**

**RISK: LOW**

**Domain 1: Patient selection**

**A. Risk of bias**

*Describe methods of patient selection:  
clinical feature of severe malaria (i.e., prostration, coma, or respiratory distress), and Plasmodium falciparum parasitemia and metabolic acidosis (base deficit >8mmol/L) and Hb>50 g/L; pediatric high-dependency unit*

- Was a consecutive or random sample of patients enrolled? Yes
- Was a case-control design avoided? Yes
- Did the study avoid inappropriate exclusions? No

**Could the selection of patients have introduced bias? RISK: HIGH**

**B. Concerns regarding applicability**

*Describe included patients (prior testing, presentation, intended use of index test and setting):  
See above*

**Is there concern that the included patients do not match the review question? CONCERN: HIGH**

**Domain 2a: Laboratory index tests**

**A. Risk of bias**

*Describe the index test and how it was conducted and interpreted:  
Acidosis: base deficit>15*

- Were the index test results interpreted without knowledge of the results of the reference standard? Yes
- Were the index test results collected prospectively? Yes
- Were the index test results established and reported using standardized clinical procedures and data collection tools? Yes
- If a threshold was used was it pre-specified? Yes

**Could the conduct or interpretation of the index test have introduced bias? RISK:LOW**

**B. Concerns regarding applicability**

**Is there concern that the index test, its conduct, or interpretation differ from the review question? CONCERN: LOW**

### Domain 3: Reference standard

#### A. Risk of bias

*Describe the reference standard and how it was conducted and interpreted:*

*Any reported death was considered to be a reference standard*

- Is the reference standard likely to correctly classify the target condition? Yes
- Were the reference standard results interpreted without knowledge of the results of the index test? Yes

**Could the reference standard, its conduct, or its interpretation have introduced bias?**

#### B. Concerns regarding applicability

**RISK: LOW**

**Is there concern that the target condition as defined by the reference standard does not match the review question?**

**CONCERN: LOW**

### Domain 4: Flow and timing

#### A. Risk of bias

*Describe any patients who did not receive the index test(s) and/or reference standard or who were excluded from the 2x2 table (refer to flow diagram):*

*No excluded patients*

*Describe the time interval and any interventions between index test(s) and reference standard:*

*NR*

- Was there an appropriate interval between index test(s) and reference standard? Yes
- Did all patients receive a reference standard? Yes
- Did patients receive the same reference standard? Yes
- Were all patients included in the analysis? Yes

**Could the patient flow have introduced bias?**

**RISK: LOW**

**Domain 1: Patient selection**

**A. Risk of bias**

*Describe methods of patient selection:*

*Children <15 years old admitted to four hospitals and diagnosed with severe malaria according to WHO criteria; daily records of paediatric admissions and of children with severe malaria reviewed and checked by trained medical officers and verified by a senior paediatrician in each hospital*

- Was a consecutive or random sample of patients enrolled? Yes
- Was a case-control design avoided? Yes
- Did the study avoid inappropriate exclusions? Yes

**Could the selection of patients have introduced bias? RISK: LOW**

**B. Concerns regarding applicability**

*Describe included patients (prior testing, presentation, intended use of index test and setting):  
See above*

**Is there concern that the included patients do not match the review question? CONCERN: LOW**

**Domain 2a: Clinical index tests**

**A. Risk of bias**

*Describe the index test and how it was conducted and interpreted*

*hyperpyrexia:  $\leq 40^{\circ}\text{C}$ , definitions of other index tests not provided, a checklist with clinical information reported for each case by medical officers and checked by senior paediatricians*

- Were the index test results interpreted without knowledge of the results of the reference standard? Yes
- Were the index test results collected prospectively? Yes
- Were the index test results established and reported using standardized clinical procedures and data collection tools? Yes

**Could the conduct or interpretation of the index test have introduced bias? RISK: LOW**

**B. Concerns regarding applicability**

**Is there concern that the index test, its conduct, or interpretation differ from the review question? CONCERN: LOW**

## Domain 2b: Laboratory index tests

### A. Risk of bias

*Describe the index test and how it was conducted and interpreted:*

*Leucocytosis:  $\geq 11000/mm^3$*

- |                                                                                                                          |     |
|--------------------------------------------------------------------------------------------------------------------------|-----|
| • Were the index test results interpreted without knowledge of the results of the reference standard?                    | Yes |
| • Were the index test results collected prospectively?                                                                   | Yes |
| • Were the index test results established and reported using standardized clinical procedures and data collection tools? | Yes |
| • If a threshold was used was it pre-specified?                                                                          | Yes |

**Could the conduct or interpretation of the index test have introduced bias?**

**RISK:LOW**

### B. Concerns regarding applicability

**Is there concern that the index test, its conduct, or interpretation** **CONCERN: LOW**

## Domain 3: Reference standard

### A. Risk of bias

*Describe the reference standard and how it was conducted and interpreted:*

*Any reported death was considered to be a reference standard*

- |                                                                                                       |     |
|-------------------------------------------------------------------------------------------------------|-----|
| • Is the reference standard likely to correctly classify the target condition?                        | Yes |
| • Were the reference standard results interpreted without knowledge of the results of the index test? | Yes |

**Could the reference standard, its conduct, or its interpretation have introduced bias?**

**RISK: LOW**

### B. Concerns regarding applicability

**Is there concern that the target condition as defined by the reference standard does not match the review question?**

**CONCERN: LOW**

## Domain 4: Flow and timing

### A. Risk of bias

*Describe any patients who did not receive the index test(s) and/or reference standard or who were excluded from the 2x2 table (refer to flow diagram):*

*No excluded patients*

*Describe the time interval and any interventions between index test(s) and reference standard:*

*NR*

- Was there an appropriate interval between index test(s) and reference standard? Yes
- Did all patients receive a reference standard? Yes
- Did patients receive the same reference standard? Yes
- Were all patients included in the analysis? Yes

**Could the patient flow have introduced bias?**

**RISK: LOW**

**Domain 1: Patient selection**

**A. Risk of bias**

*Describe methods of patient selection:  
children ≥6 months with severe malaria during rainy season from 1996 till 2005, paediatric research ward; not all children with severe malaria are admitted to the research ward, research emphasis on cerebral malaria*

- Was a consecutive or random sample of patients enrolled? Yes
- Was a case-control design avoided? Yes
- Did the study avoid inappropriate exclusions? No

**Could the selection of patients have introduced bias? RISK: HIGH**

**B. Concerns regarding applicability**

*Describe included patients (prior testing, presentation, intended use of index test and setting):  
Final diagnosis of severe malaria based on presence of 1 of 3 syndromes: cerebral malaria, severe malarial anaemia, or CM with SMA*

**Is there concern that the included patients do not match the review question? CONCERN: HIGH**

**Domain 2a: Clinical index tests**

**A. Risk of bias**

*Describe the index test and how it was conducted and interpreted  
All children undergo a complete, standardized history and physical examination  
Severe anaemia: BCS ≥ 3 and with either 1) a PCV ≤ 10%, 2) a PCV of 11%-15% with evidence of clinical decompensation, or 3) a PCV of > 15% with the requirement of blood transfusion  
Cerebral malaria: BCS ≤ 2 persisting for > 2 hours after other identifiable causes of coma have been excluded*

- Were the index test results interpreted without knowledge of the results of the reference standard? Yes
- Were the index test results collected prospectively? Yes
- Were the index test results established and reported using standardized clinical procedures and data collection tools? Yes

**Could the conduct or interpretation of the index test have introduced bias? RISK: LOW**

**B. Concerns regarding applicability**



Is there concern that the index test, its conduct, or interpretation differ from the review question? **CONCERN: LOW**

### Domain 2b: Laboratory index tests

#### A. Risk of bias

*Describe the index test and how it was conducted and interpreted:*  
*HIV test*

- Were the index test results interpreted without knowledge of the results of the reference standard? Yes
- Were the index test results collected prospectively? Yes
- Were the index test results established and reported using standardized clinical procedures and data collection tools? Yes
- If a threshold was used was it pre-specified? Yes

Could the conduct or interpretation of the index test have introduced bias? **RISK:LOW**

#### B. Concerns regarding applicability

Is there concern that the index test, its conduct, or interpretation **CONCERN: LOW**

### Domain 3: Reference standard

#### A. Risk of bias

*Describe the reference standard and how it was conducted and interpreted:*  
*Any reported death was considered to be a reference standard*

- Is the reference standard likely to correctly classify the target condition? Yes
- Were the reference standard results interpreted without knowledge of the results of the index test? Yes

Could the reference standard, its conduct, or its interpretation have introduced bias? **RISK: LOW**

#### B. Concerns regarding applicability

Is there concern that the target condition as defined by the reference standard does not match the review question? **CONCERN: LOW**

## Domain 4: Flow and timing

### A. Risk of bias

*Describe any patients who did not receive the index test(s) and/or reference standard or who were excluded from the 2x2 table (refer to flow diagram):*

*No excluded patients in patients with severe anemia or cerebral malaria 2x2 tables, 1119/1388 (81%) patients with determined HIV status*

*Describe the time interval and any interventions between index test(s) and reference standard:*

NR

- Was there an appropriate interval between index test(s) and reference standard? Yes
- Did all patients receive a reference standard? Yes
- Did patients receive the same reference standard? Yes
- Were all patients included in the analysis? Yes

**Could the patient flow have introduced bias?**

**RISK: LOW**

**Domain 1: Patient selection**

**A.Risk of bias**

*Describe methods of patient selection:  
Children aged 1-120 months with diagnosis "non per os" falciparum malaria (all patients hospitalized for malaria and treated with iv quinine); 2 areas: rural and urban, medical research units*

- Was a consecutive or random sample of patients enrolled? Yes
- Was a case-control design avoided? Yes
- Did the study avoid inappropriate exclusions? No

**Could the selection of patients have introduced bias? RISK: HIGH**

**B.Concerns regarding applicability**

*Describe included patients (prior testing, presentation, intended use of index test and setting):  
Each inclusion involved an assessment of various established prognostic features based on 2000 WHO severe malaria definition: coma, convulsions, hypoglycemia, severe anaemia, respiratory distress, prostration, vomiting. All malaria patients divided accordingly into moderate malaria group (BCS=3-4) and severe malaria group (BCS≤2)*

**Is there concern that the included patients do not match the review question? CONCERN:UNCLEAR**

**Domain 2a: Clinical index tests**

**A. Risk of bias**

*Describe the index test and how it was conducted and interpreted  
Cerebral malaria : BCS≤2, respiratory distress: presence of abnormalities in RR, rhythm (kussmaul or Cheyne-Stokes breathing), signs of distress such as nasal flaring, subcostal/intersotal recession*

- Were the index test results interpreted without knowledge of the results of the reference standard? Yes
- Were the index test results collected prospectively? Yes
- Were the index test results established and reported using standardized clinical procedures and data collection tools? Yes

**Could the conduct or interpretation of the index test have introduced bias? RISK:LOW**

**B. Concerns regarding applicability**

**Is there concern that the index test, its conduct, or interpretation differ from the review question? CONCERN: LOW**

## Domain 2b: Laboratory index tests

### A. Risk of bias

*Describe the index test and how it was conducted and interpreted:*

*Severe anaemia: Hb<5g/dL, hypoglycemia: <2.2 mmol/L*

- Were the index test results interpreted without knowledge of the results of the reference standard? Yes
- Were the index test results collected prospectively? Yes
- Were the index test results established and reported using standardized clinical procedures and data collection tools? Yes
- If a threshold was used was it pre-specified? Yes

**Could the conduct or interpretation of the index test have introduced bias?**

**RISK:LOW**

### B. Concerns regarding applicability

**Is there concern that the index test, its conduct, or interpretation** **CONCERN: LOW**

## Domain 3: Reference standard

### A. Risk of bias

*Describe the reference standard and how it was conducted and interpreted:*

*Any reported death was considered to be a reference standard*

- Is the reference standard likely to correctly classify the target condition? Yes
- Were the reference standard results interpreted without knowledge of the results of the index test? Yes

**Could the reference standard, its conduct, or its interpretation have introduced bias?**

**RISK: LOW**

### B. Concerns regarding applicability

**Is there concern that the target condition as defined by the reference standard does not match the review question?**

**CONCERN: LOW**

## Domain 4: Flow and timing

### A. Risk of bias

*Describe any patients who did not receive the index test(s) and/or reference standard or who were excluded from the 2x2 table (refer to flow diagram):*

*No excluded patients*

*Describe the time interval and any interventions between index test(s) and reference standard:*

*NR*

- Was there an appropriate interval between index test(s) and reference standard? Yes
- Did all patients receive a reference standard? Yes
- Did patients receive the same reference standard? Yes
- Were all patients included in the analysis? Yes

**Could the patient flow have introduced bias?**

**RISK: LOW**

**Domain 1: Patient selection**

**A. Risk of bias**

*Describe methods of patient selection:  
All children between 6 and 59 months of age with diagnosis suggestive of acute disease*

- Was a consecutive or random sample of patients enrolled? Yes
- Was a case-control design avoided? Yes
- Did the study avoid inappropriate exclusions? No

**Could the selection of patients have introduced bias? RISK: HIGH**

**B. Concerns regarding applicability**

*Describe included patients (prior testing, presentation, intended use of index test and setting):  
Criteria for diagnosis and enrolment included the standard WHO definition*

**Is there concern that the included patients do not match the review question? CONCERN: LOW**

**Domain 2a: Clinical index tests**

**A. Risk of bias**

*Describe the index test and how it was conducted and interpreted:  
Coma score : BCS<3, no further details provided*

- Were the index test results interpreted without knowledge of the results of the reference standard? Yes
- Were the index test results collected prospectively? Yes
- Were the index test results established and reported using standardized clinical procedures and data collection tools? Yes

**Could the conduct or interpretation of the index test have introduced bias? RISK:LOW**

**B. Concerns regarding applicability**

**Is there concern that the index test, its conduct, or interpretation differ from the review question? CONCERN: UNCLEAR**

## Domain 2b: Laboratory index tests

### A. Risk of bias

*Describe the index test and how it was conducted and interpreted:*

*On admission blood lactate done for all participants. No further details, including threshold, provided*

- Were the index test results interpreted without knowledge of the results of the reference standard? Yes
- Were the index test results collected prospectively? Yes
- Were the index test results established and reported using standardized clinical procedures and data collection tools? Yes
- If a threshold was used was it pre-specified? Unclear

**Could the conduct or interpretation of the index test have introduced bias?**

**RISK:LOW**

### B. Concerns regarding applicability

**Is there concern that the index test, its conduct, or interpretation differ from the review question?** **CONCERN: UNCLEAR**

## Domain 3: Reference standard

### A. Risk of bias

*Describe the reference standard and how it was conducted and interpreted:*

*Any reported death was considered to be a reference standard*

- Is the reference standard likely to correctly classify the target condition? Yes
- Were the reference standard results interpreted without knowledge of the results of the index test? Yes

**Could the reference standard, its conduct, or its interpretation have introduced bias?**

**RISK: LOW**

### B. Concerns regarding applicability

**Is there concern that the target condition as defined by the reference standard does not match the review question?**

**CONCERN: LOW**

## Domain 4: Flow and timing

### A. Risk of bias

*Describe any patients who did not receive the index test(s) and/or reference standard or who were excluded from the 2x2 table (refer to flow diagram):*

*No excluded patients*

*Describe the time interval and any interventions between index test(s) and reference standard:*

*NR*

- Was there an appropriate interval between index test(s) and reference standard? Yes
- Did all patients receive a reference standard? Yes
- Did patients receive the same reference standard? Yes
- Were all patients included in the analysis? Yes

**Could the patient flow have introduced bias?**

**RISK: LOW**



**Domain 1: Patient selection**

**A. Risk of bias**

*Describe methods of patient selection:*

*Microscopy-confirmed malaria cases, retrospective review, files of all children*

- Was a consecutive or random sample of patients enrolled? Yes
- Was a case-control design avoided? Yes
- Did the study avoid inappropriate exclusions? No

**Could the selection of patients have introduced bias? RISK: HIGH**

**B. Concerns regarding applicability**

*Describe included patients (prior testing, presentation, intended use of index test and setting):*

*Cases of severe malaria defined according to 2010 WHO criteria*

**Is there concern that the included patients do not match the review question? CONCERN: LOW**

**Domain 2a: Clinical index tests**

**A. Risk of bias**

*Describe the index test and how it was conducted and interpreted:*

*NR*

- Were the index test results interpreted without knowledge of the results of the reference standard? Yes
- Were the index test results collected prospectively? No
- Were the index test results established and reported using standardized clinical procedures and data collection tools? Yes

**Could the conduct or interpretation of the index test have introduced bias? RISK:UNCLEAR**

**B. Concerns regarding applicability**

**Is there concern that the index test, its conduct, or interpretation differ from the review question? CONCERN: LOW**

## Domain 2b: Laboratory index tests

### A. Risk of bias

*Describe the index test and how it was conducted and interpreted:*  
NR

- Were the index test results interpreted without knowledge of the results of the reference standard? Yes
- Were the index test results collected prospectively? Yes
- Were the index test results established and reported using standardized clinical procedures and data collection tools? Yes
- If a threshold was used was it pre-specified? Unclear

**Could the conduct or interpretation of the index test have introduced bias?**

**RISK:UNCLEAR**

### B. Concerns regarding applicability

**Is there concern that the index test, its conduct, or interpretation differ from the review question?** **CONCERN: LOW**

## Domain 3: Reference standard

### A. Risk of bias

*Describe the reference standard and how it was conducted and interpreted:*  
Any reported death was considered to be a reference standard

- Is the reference standard likely to correctly classify the target condition? Yes
- Were the reference standard results interpreted without knowledge of the results of the index test? Yes

**Could the reference standard, its conduct, or its interpretation have introduced bias?**

**RISK: LOW**

### B. Concerns regarding applicability

**Is there concern that the target condition as defined by the reference standard does not match the review question?**

**CONCERN: LOW**

## Domain 4: Flow and timing

### A. Risk of bias

*Describe any patients who did not receive the index test(s) and/or reference standard or who were excluded from the 2x2 table (refer to flow diagram):*

*102 patients excluded as unable to be traced*

*Describe the time interval and any interventions between index test(s) and reference standard:*

*NR*

- Was there an appropriate interval between index test(s) and reference standard? Yes
- Did all patients receive a reference standard? Yes
- Did patients receive the same reference standard? Yes
- Were all patients included in the analysis? Yes

**Could the patient flow have introduced bias?**

**RISK: LOW**

**Domain 1: Patient selection**

**A. Risk of bias**

*Describe methods of patient selection:*

*Children <15 years admitted to the hospital, retrospective study; children with malaria included any sign of severe disease (PCV<15%, deep coma, prostration, hypoglycemia, convulsions, respiratory distress), inability to take oral medication, or moderate anaemia with a risk of cardio-respiratory decompensation*

- Was a consecutive or random sample of patients enrolled? Yes
- Was a case-control design avoided? Yes
- Did the study avoid inappropriate exclusions? Yes

**Could the selection of patients have introduced bias? RISK: LOW**

**B. Concerns regarding applicability**

*Describe included patients (prior testing, presentation, intended use of index test and setting):*

*A sub-group of patients with severe malaria was differentiated*

**Is there concern that the included patients do not match the review question? CONCERN: LOW**

**Domain 2a: Clinical index tests**

**A. Risk of bias**

*Describe the index test and how it was conducted and interpreted:*

*Deep coma: BCS≤2, prostration: inability to sit unaided or to look for mother's breast/feed in children who cannot yet sit, convulsions: ≥2 reported episodes in the 24 hours before admission, respiratory distress: deep breathing or indrawing; a standardized admission questionnaire; a physician or experienced medical officer performed a physical exam of the children on admission and filled the questionnaire.*

- Were the index test results interpreted without knowledge of the results of the reference standard? Yes
- Were the index test results collected prospectively? Yes
- Were the index test results established and reported using standardized clinical procedures and data collection tools? Yes

**Could the conduct or interpretation of the index test have introduced bias? RISK:LOW**

**B. Concerns regarding applicability**

**Is there concern that the index test, its conduct, or interpretation differ from the review question? CONCERN: LOW**

## Domain 2b: Laboratory index tests

### A. Risk of bias

*Describe the index test and how it was conducted and interpreted:*

*Hypoglycemia: <2.2 mmol/L, anaemia: PCV<15%; standardized admission questionnaire, including laboratory data*

- Were the index test results interpreted without knowledge of the results of the reference standard? Yes
- Were the index test results collected prospectively? No
- Were the index test results established and reported using standardized clinical procedures and data collection tools? Yes
- If a threshold was used was it pre-specified? Yes

**Could the conduct or interpretation of the index test have introduced bias?**

**RISK:LOW**

### B. Concerns regarding applicability

**Is there concern that the index test, its conduct, or interpretation differ from the review question?**

**CONCERN: LOW**

## Domain 3: Reference standard

### A. Risk of bias

*Describe the reference standard and how it was conducted and interpreted:*

*Any reported death was considered to be a reference standard; all cases of malaria death based on the admission questionnaire were reviewed by a paediatrician and reclassified according to the clinical evolution and other co-existing diagnoses*

- Is the reference standard likely to correctly classify the target condition? Yes
- Were the reference standard results interpreted without knowledge of the results of the index test? Yes

**Could the reference standard, its conduct, or its interpretation have introduced bias?**

**RISK: LOW**

### B. Concerns regarding applicability

**Is there concern that the target condition as defined by the reference standard does not match the review question?**

**CONCERN: LOW**

## Domain 4: Flow and timing

### A. Risk of bias

*Describe any patients who did not receive the index test(s) and/or reference standard or who were excluded from the 2x2 table (refer to flow diagram):*

*Number of excluded patients < 20%*

*Describe the time interval and any interventions between index test(s) and reference standard:*

*25% of patients died on admission day, >50% of patients died within the first 48 h of arriving to hospital*

- Was there an appropriate interval between index test(s) and reference standard? Yes
- Did all patients receive a reference standard? Yes
- Did patients receive the same reference standard? Yes
- Were all patients included in the analysis? Yes

**Could the patient flow have introduced bias?**

**RISK: LOW**

**Domain 1: Patient selection**

**A. Risk of bias**

*Describe methods of patient selection:  
All children admitted during the malaria transmission season if admitting physician diagnosed a severe febrile illness suspected to be malaria; all children diagnosed with cerebral malaria and/or severe malarial anaemia were included*

- Was a consecutive or random sample of patients enrolled? Yes
- Was a case-control design avoided? Yes
- Did the study avoid inappropriate exclusions? No

**Could the selection of patients have introduced bias? RISK: HIGH**

**B. Concerns regarding applicability**

*Describe included patients (prior testing, presentation, intended use of index test and setting):  
P. falciparum malaria diagnosed if a child had a body temperature >38° together with P. falciparum trophozoites, and no suggestion of other diagnoses by history or clinical examination and simple laboratory investigation; index tests applied only to the group of patients with cerebral malaria or/and severe malarial anemia*

**Is there concern that the included patients do not match the review question? CONCERN: HIGH**

**Domain 2a: Clinical index tests**

**A. Risk of bias**

*Describe the index test and how it was conducted and interpreted:  
Cerebral malaria: BCS<3 persisting for ≥30 minutes and/or occurrence of ≥2 seizures in last 24 h and no other cause of seizure or coma such; severe malarial anaemia: PCV<15% or Hb<5 g/dL; respiratory distress: alar flaring or chest recession or use of accessory respiratory muscles or abnormally deep breathing; dehydration decreased skin turgor or delayed capillary refill time or sunken eyes or dry mucous membranes or absence of tears; spleen and liver: palpation; a sick child evaluated within 15 minutes of referral, medical history/ examination findings recorded on a standardized sheet*

- Were the index test results interpreted without knowledge of the results of the reference standard? Yes
- Were the index test results collected prospectively? Yes
- Were the index test results established and reported using standardized clinical procedures and data collection tools? Yes

**Could the conduct or interpretation of the index test have introduced bias? RISK: LOW**

**B. Concerns regarding applicability**

**Is there concern that the index test, its conduct, or interpretation differ from the review question? CONCERN: LOW**

## Domain 2b: Laboratory index tests

### A. Risk of bias

*Describe the index test and how it was conducted and interpreted:*

*Hypoglycemia: blood glucose < 2.6 mmol/L, sever anemia: PCV < 15% or Hb < 5 g/dL)*

- Were the index test results interpreted without knowledge of the results of the reference standard? Yes
- Were the index test results collected prospectively? Yes
- Were the index test results established and reported using standardized clinical procedures and data collection tools? Yes
- If a threshold was used was it pre-specified? Yes

**Could the conduct or interpretation of the index test have introduced bias?**

**RISK: LOW**

### B. Concerns regarding applicability

**Is there concern that the index test, its conduct, or interpretation differ from the review question?**

**CONCERN: LOW**

## Domain 3: Reference standard

### A. Risk of bias

*Describe the reference standard and how it was conducted and interpreted:*

*Any reported death was considered to be a reference standard*

- Is the reference standard likely to correctly classify the target condition? Yes
- Were the reference standard results interpreted without knowledge of the results of the index test? Yes

**Could the reference standard, its conduct, or its interpretation have introduced bias?**

**RISK: LOW**

### B. Concerns regarding applicability

**Is there concern that the target condition as defined by the reference standard does not match the review question?**

**CONCERN: LOW**



## Domain 4: Flow and timing

### A. Risk of bias

*Describe any patients who did not receive the index test(s) and/or reference standard or who were excluded from the 2x2 table (refer to flow diagram):*

*No excluded patients*

*Describe the time interval and any interventions between index test(s) and reference standard:*

*50% of children died within 12 hours*

- Was there an appropriate interval between index test(s) and reference standard? Yes
- Did all patients receive a reference standard? Yes
- Did patients receive the same reference standard? Yes
- Were all patients included in the analysis? Yes

**Could the patient flow have introduced bias?**

**RISK: LOW**

**Domain 1: Patient selection**

**A. Risk of bias**

*Describe methods of patient selection:*  
*Retrospective review of case notes of all children with severe malaria, paediatric high dependency unit; case notes of unselected children fulfilling strictly-defined criteria for severe malaria (P.falciparum and impaired consciousness/respiratory distress) were reviewed*

- Was a consecutive or random sample of patients enrolled? Yes
- Was a case-control design avoided? Yes
- Did the study avoid inappropriate exclusions? Yes

**Could the selection of patients have introduced bias? RISK: LOW**

**B. Concerns regarding applicability**

*Describe included patients (prior testing, presentation, intended use of index test and setting):*  
*See above*

**Is there concern that the included patients do not match the review question? CONCERN: LOW**

**Domain 2: Laboratory index tests**

**A. Risk of bias**

*Describe the index test and how it was conducted and interpreted:*  
*Hypoglycemia:  $\leq 3$  mmol/L, index test received by all paediatric admissions*

- Were the index test results interpreted without knowledge of the results of the reference standard? Yes
- Were the index test results collected prospectively? Yes
- Were the index test results established and reported using standardized clinical procedures and data collection tools? Yes
- If a threshold was used was it pre-specified? Yes

**Could the conduct or interpretation of the index test have introduced bias? RISK: LOW**

**B. Concerns regarding applicability**

**Is there concern that the index test, its conduct, or interpretation differ from the review question? CONCERN: LOW**

### Domain 3: Reference standard

#### A. Risk of bias

*Describe the reference standard and how it was conducted and interpreted:*

*Any reported death was considered to be a reference standard*

- Is the reference standard likely to correctly classify the target condition? Yes
- Were the reference standard results interpreted without knowledge of the results of the index test? Yes

**Could the reference standard, its conduct, or its interpretation have introduced bias?**

#### B. Concerns regarding applicability

**RISK: LOW**

**Is there concern that the target condition as defined by the reference standard does not match the review question?**

**CONCERN: LOW**

### Domain 4: Flow and timing

#### A. Risk of Bias

*Describe any patients who did not receive the index test(s) and/or reference standard or who were excluded from the 2x2 table (refer to flow diagram):*

*No excluded patients*

*Describe the time interval and any interventions between index test(s) and reference standard:*

*NR*

- Was there an appropriate interval between index test(s) and reference standard? Yes
- Did all patients receive a reference standard? Yes
- Did patients receive the same reference standard? Yes
- Were all patients included in the analysis? Yes

**Could the patient flow have introduced bias?**

**No**

**Domain 1: Patient selection**

**A. Risk of bias**

*Describe methods of patient selection:*

All children, 0-15 years

- Was a consecutive or random sample of patients enrolled?
- Was a case-control design avoided? Yes
- Did the study avoid inappropriate exclusions? Yes

**Could the selection of patients have introduced bias?** Yes

**B. Concerns regarding applicability** **RISK: LOW**

*Describe included patients (prior testing, presentation, intended use of index test and setting):*

*P. falciparum positive patients with 1≥ severe malaria criteria (2000 WHO)*

**Is there concern that the included patients do not match the review question?** **CONCERN: LOW**

**Domain 2a: Clinical index tests**

**A. Risk of bias**

*Describe the index test and how it was conducted and interpreted:*

*All severe malaria criteria evaluated within 24 h following admission; coma: BCS≤2, convulsions: ≥2 in last 24 h , pulmonary oedeme (CXR), circulatory collapse: TAS<60mmHg<5 years or TAS<80 mmHg*

- Were the index test results interpreted without knowledge of the results of the reference standard? Yes
- Were the index test results collected prospectively? Yes
- Were the index test results established and reported using standardized clinical procedures and data collection tools? Unclear

**Could the conduct or interpretation of the index test have introduced bias?** **RISK:UNCLEAR**

**B. Concerns regarding applicability**

**Is there concern that the index test, its conduct, or interpretation differ from the review question?** **CONCERN: LOW**

**Domain 2b: Laboratory index tests**

**A. Risk of bias**

*Describe the index test and how it was conducted and interpreted:*

*Hypoglycemia. <2.2 mmol/L, hypercreatinemia: >70µmol/L, hemoglobin: ≤5g/dl*

- Were the index test results interpreted without knowledge of the results of the reference standard? Yes
- Were the index test results collected prospectively? Yes
- Were the index test results established and reported using

- standardized clinical procedures and data collection tools? Unclear
- If a threshold was used was it pre-specified? Yes

**Could the conduct or interpretation of the index test have introduced bias? RISK:UNCLEAR**

**B. Concerns regarding applicability**

**Is there concern that the index test, its conduct, or interpretation differ from the review question? CONCERN: LOW**

**Domain 3: Reference standard**

**A. Risk of bias**

*Describe the reference standard and how it was conducted and interpreted:  
Any reported death was considered to be a reference standard*

- Is the reference standard likely to correctly classify the target condition? Yes
- Were the reference standard results interpreted without knowledge of the results of the index test? Yes

**Could the reference standard, its conduct, or its interpretation have introduced bias?**

**B. Concerns regarding applicability RISK: LOW**

**Is there concern that the target condition as defined by the reference standard does not match the review question? CONCERN: LOW**

**Domain 4: Flow and timing**

**A. Risk of bias**

*Describe any patients who did not receive the index test(s) and/or reference standard or who were excluded from the 2x2 table (refer to flow diagram):  
No excluded patients  
Describe the time interval and any interventions between index test(s) and reference standard:  
NR*

- Was there an appropriate interval between index test(s) and reference standard? Yes
- Did all patients receive a reference standard? Yes
- Did patients receive the same reference standard? Yes
- Were all patients included in the analysis? Yes

**Could the patients flow have introduced bias? RISK:LOW**

**Domain 1: Patient selection**

**A. Risk of bias**

*Describe methods of patient selection:*

*Children (<15 years) and adults (≥15 years) with suspected severe malaria according to modified WHO criteria, confirmed by blood test*

- Was a consecutive or random sample of patients enrolled? Yes
- Was a case-control design avoided? Yes
- Did the study avoid inappropriate exclusions? Yes

**Could the selection of patients have introduced bias?**

**B. Concerns regarding applicability**

**RISK: LOW**

*Describe included patients (prior testing, presentation, intended use of index test and setting):*

*See above*

**Is there concern that the included patients do not match the review question?**

**CONCERN: LOW**

**Domain 2b: Laboratory index tests**

**A. Risk of bias**

*Describe the index test and how it was conducted and interpreted:*

*HIV-infection: HIV antibody test followed by confirmation test*

- Were the index test results interpreted without knowledge of the results of the reference standard? Yes
- Were the index test results collected prospectively? Yes
- Were the index test results established and reported using standardized clinical procedures and data collection tools? Yes
- If a threshold was used was it pre-specified? Yes

**Could the conduct or interpretation of the index test have introduced bias?**

**RISK: LOW**

**B. Concerns regarding applicability**

**Is there concern that the index test, its conduct, or interpretation differ from the review question?**

**CONCERN: LOW**

### Domain 3: Reference standard

#### A. Risk of bias

*Describe the reference standard and how it was conducted and interpreted:*

*Any reported death was considered to be a reference standard*

- Is the reference standard likely to correctly classify the target condition? Yes
- Were the reference standard results interpreted without knowledge of the results of the index test? Yes

**Could the reference standard, its conduct, or its interpretation have introduced bias?**

#### B. Concerns regarding applicability

**RISK: LOW**

**Is there concern that the target condition as defined by the reference standard does not match the review question?**

**CONCERN: LOW**

### Domain 4: Flow and timing

#### A. Risk of bias

*Describe any patients who did not receive the index test(s) and/or reference standard or who were excluded from the 2x2 table (refer to flow diagram):*

*Number of excluded patients < 20%*

*Describe the time interval and any interventions between index test(s) and reference standard:*

*NR*

- Was there an appropriate interval between index test(s) and reference standard? Yes
- Did all patients receive a reference standard? Yes
- Did patients receive the same reference standard? Yes
- Were all patients included in the analysis? Yes

**Could the patients flow have introduced bias?**

**RISK: LOW**

**Domain 1: Patient selection**

**A. Risk of bias**

*Describe methods of patient selection:*

*Children with signs of severe malaria confirmed by RDT*

- Was a consecutive or random sample of patients enrolled? Yes
- Was a case-control design avoided? Yes
- Did the study avoid inappropriate exclusions? Yes

**Could the selection of patients have introduced bias?**

Yes

**B. Concerns regarding applicability**

**RISK: LOW**

*Describe included patients (prior testing, presentation, intended use of index test and setting):*

*Modified severe malaria criteria according to WHO*

**Is there concern that the included patients do not match the review question?**

**CONCERN: LOW**

**Domain 2a: Clinical index tests**

**A. Risk of bias**

*Describe the index test and how it was conducted and interpreted:*

*Coma: BCS<3, respiratory distress: costal indrawing, use of accessory muscles, nasal alar flaring, deep breathing, or severe tachypnoea, shock: compensated or decompensated*

- Were the index test results interpreted without knowledge of the results of the reference standard? Yes
- Were the index test results collected prospectively? Yes
- Were the index test results established and reported using standardized clinical procedures and data collection tools? Yes

**Could the conduct or interpretation of the index test have introduced bias?**

**RISK:LOW**

**B. Concerns regarding applicability**

**Is there concern that the index test, its conduct, or interpretation differ from the review question?**

**CONCERN: LOW**

**Domain 2b: Laboratory index tests**

**A. Risk of bias**

*Describe the index test and how it was conducted and interpreted:*

*Severe anaemia: <5 g/dL, hypoglycemia: <3 mmol/L, acidosis<- 8 mmol/L*

- Were the index test results interpreted without knowledge of the results of the reference standard? Yes
- Were the index test results collected prospectively? Yes
- Were the index test results established and reported using standardized clinical procedures and data collection tools? Yes



- If a threshold was used was it pre-specified? Yes

**Could the conduct or interpretation of the index test have introduced bias?** RISK:LOW

**B. Concerns regarding applicability**

**Is there concern that the index test, its conduct, or interpretation differ from the review question?** CONCERN: LOW

**Domain 3: Reference standard**

**A. Risk of bias**

*Describe the reference standard and how it was conducted and interpreted:*

*Any reported death was considered to be a reference standard*

- Is the reference standard likely to correctly classify the target condition? Yes
- Were the reference standard results interpreted without knowledge of the results of the index test? Yes

**Could the reference standard, its conduct, or its interpretation have introduced bias?** RISK: LOW

**B. Concerns regarding applicability**

**Is there concern that the target condition as defined by the reference standard does not match the review question?** CONCERN: LOW

**Domain 4: Flow and timing**

**A. Risk of bias**

*Describe any patients who did not receive the index test(s) and/or reference standard or who were excluded from the 2x2 table (refer to flow diagram):*

*No excluded patients*

*Describe the time interval and any interventions between index test(s) and reference standard:*

*NR*

- Was there an appropriate interval between index test(s) and reference standard? Yes
- Did all patients receive a reference standard? Yes
- Did patients receive the same reference standard? Yes
- Were all patients included in the analysis? Yes

**Could the patients flow have introduced bias?** RISK:LOW

**Domain 1: Patient selection**

**A. Risk of bias**

*Describe methods of patient selection:*

*Children aged 4 months-14 years, blood smear positive for P. falciparum and one or more WHO criteria for severe malaria*

- Was a consecutive or random sample of patients enrolled? Yes
- Was a case-control design avoided? Yes
- Did the study avoid inappropriate exclusions? Yes

**Could the selection of patients have introduced bias?**

Yes

**B. Concerns regarding applicability**

**RISK: LOW**

*Describe included patients (prior testing, presentation, intended use of index test and setting):*  
See above

**Is there concern that the included patients do not match the review question?**

**CONCERN: LOW**

**Domain 2a: Clinical index tests**

**A. Risk of bias**

*Describe the index test and how it was conducted and interpreted:*

*Respiratory distress: indrawing or use of accessory muscles or nasal flaring or deep breathing, convulsions: >3 in last 24 h, decompensated shock: SBP <70 mmHg, prostration: inability to sit unaided in children >7 months, jaundice, hyperpyrexia >40°C*

- Were the index test results interpreted without knowledge of the results of the reference standard? Yes
- Were the index test results collected prospectively? Yes
- Were the index test results established and reported using standardized clinical procedures and data collection tools? Yes

**Could the conduct or interpretation of the index test have introduced bias?**

**RISK: LOW**

**B. Concerns regarding applicability**

**Is there concern that the index test, its conduct, or interpretation differ from the review question?**

**CONCERN: LOW**

**Domain 2b: Laboratory index tests**

**A. Risk of bias**

*Describe the index test and how it was conducted and interpreted:*

*Severe anaemia: Hb <50 g/L or PCV <15, hypoglycemia: <2.2 mM, acidosis: plasma bicarbonate <15 mmol/L, hyperlactatemia: plasma lactate >5 mmol/L, hyperparasitemia: ≥ 500 000 parasites/μL, renal failure: urine output of >12 ml/Kg over 24 h*

- Were the index test results interpreted without knowledge of the results of the reference standard? Yes

- Were the index test results collected prospectively? Yes
- Were the index test results established and reported using standardized clinical procedures and data collection tools? Yes
- If a threshold was used was it pre-specified? Yes

**Could the conduct or interpretation of the index test have introduced bias? RISK:LOW**

**B. Concerns regarding applicability**

**Is there concern that the index test, its conduct, or interpretation differ from the review question? CONCERN: LOW**

**Domain 3: Reference standard**

**A. Risk of bias**

*Describe the reference standard and how it was conducted and interpreted:  
Any reported death was considered to be a reference standard*

- Is the reference standard likely to correctly classify the target condition?
- Were the reference standard results interpreted without knowledge of the results of the index test?

**Could the reference standard, its conduct, or its interpretation have introduced bias?**

**B. Concerns regarding applicability RISK: LOW**

**Is there concern that the target condition as defined by the reference standard does not match the review question? CONCERN: LOW**

**Domain 4: Flow and timing**

**A. Risk of bias**

*Describe any patients who did not receive the index test(s) and/or reference standard or who were excluded from the 2x2 table (refer to flow diagram):*

*Plasma lactate available in 16% of enrolled patients, evaluation of convulsions available in 35% enrolled patients, plasma bicarbonate available in 10% of enrolled patients, blood glucose level available in 70%, evaluation of hypotensive shock performed in 16% of enrolled patients*

*Describe the time interval and any interventions between index test(s) and reference standard:  
NR*

- Was there an appropriate interval between index test(s) and reference standard? Yes
- Did all patients receive a reference standard? Yes
- Did patients receive the same reference standard? Yes
- Were all patients included in the analysis? No

**Could the patients flow have introduced bias? RISK: HIGH**

**Domain 1: Patient selection**

**A. Risk of bias**

*Describe methods of patient selection:*

*Children <15 years old with a positive RDT for P.falciparum lactate dehydrogenase with clinically stated severe malaria*

- Was a consecutive or random sample of patients enrolled? Yes
- Was a case-control design avoided? Yes
- Did the study avoid inappropriate exclusions? Yes

**Could the selection of patients have introduced bias?**

**B. Concerns regarding applicability**

**RISK: LOW**

*Describe included patients (prior testing, presentation, intended use of index test and setting):*

*See above*

**Is there concern that the included patients do not match the review question?**

**CONCERN: LOW**

**Domain 2: Clinical index tests**

**A. Risk of bias**

*Describe the index test and how it was conducted and interpreted:*

*Convulsions: 30 min or longer or ≥2 in 24; coma: BCS≤2; prostration: unable to sit unsupported, if <6 months unable to breastfeed; respiratory distress: costal indrawing, use of accessory muscles, nasal alar flaring, deep breathing: labored breathing with abnormally deep chest excursions; shock: compensated or decompensated; chronic disease: lymphadenopathy, malnutrition, candidiasis, severe visible wasting or desquamation*

- Were the index test results interpreted without knowledge of the results of the reference standard? Yes
- Were the index test results collected prospectively? Yes
- Were the index test results established and reported using standardized clinical procedures and data collection tools? Yes

**Could the conduct or interpretation of the index test have introduced bias?**

**RISK: LOW**

**B. Concerns regarding applicability**

**Is there concern that the index test, its conduct, or interpretation differ from the review question?**

**CONCERN: LOW**

### Domain 3: Reference standard

#### A. Risk of bias

*Describe the reference standard and how it was conducted and interpreted:*

*Any reported death was considered to be a reference standard*

- Is the reference standard likely to correctly classify the target condition?
- Were the reference standard results interpreted without knowledge of the results of the index test?

**Could the reference standard, its conduct, or its interpretation have introduced bias?**

**RISK: LOW**

#### B. Concerns regarding applicability

**Is there concern that the target condition as defined by the reference standard does not match the review question?**

**CONCERN: LOW**

### Domain 4: Flow and timing

#### A. Risk of bias

*Describe any patients who did not receive the index test(s) and/or reference standard or who were excluded from the 2x2 table (refer to flow diagram):*

*Excluded patients < 20%*

*Describe the time interval and any interventions between index test(s) and reference standard:*

*NR*

- Was there an appropriate interval between index test(s) and reference standard? Yes
- Did all patients receive a reference standard? Yes
- Did patients receive the same reference standard? Yes
- Were all patients included in the analysis? Yes

**Could the patient flow have introduced bias?**

**RISK: LOW**

**Domain 1: Patient selection**

**A. Risk of bias**

*Describe methods of patient selection:  
 Febrile children (6-59 months) with positive P.falciparum on blood film and features of the WHO case definition for severe malaria*

- Was a consecutive or random sample of patients enrolled? Yes
- Was a case-control design avoided? Yes
- Did the study avoid inappropriate exclusions? Yes

**Could the selection of patients have introduced bias?**

**B. Concerns regarding applicability RISK: LOW**

*Describe included patients (prior testing, presentation, intended use of index test and setting):  
 See above*

**Is there concern that the included patients do not match the review question?**

**CONCERN: LOW**

**Domain 2: Clinical index tests**

**A. Risk of bias**

*Describe the index test and how it was conducted and interpreted:  
 Arterial oxygen saturation measured with an appropriately sized oxygen sensor placed on the right toe or finger; BCS $\leq$ 2, prostration: inability to sit unsupported or the inability to drink or breast-feed in younger children; convulsions ( $\geq$ 2 in last 24 hours, or >30 minutes); respiratory distress (flaring of alar nasi, subcostal or lower chest in-drawing, tachypnea, deep breathing; coca-cola urine; jaundice, hyperparasitemia. Data recorded at the time of admission into a structured questionnaire by doctors and research assistants.*

- Were the index test results interpreted without knowledge of the results of the reference standard? Yes
- Were the index test results collected prospectively? Yes
- Were the index test results established and reported using standardized clinical procedures and data collection tools? Yes

**Could the conduct or interpretation of the index test have introduced bias?**

**RISK:LOW**

**B. Concerns regarding applicability**

**Is there concern that the index test, its conduct, or interpretation differ from the review question?**

**CONCERN: LOW**

## Domain 2b: Laboratory index tests

### C. Risk of bias

*Describe the index test and how it was conducted and interpreted:*

*hypoglycemia (< 3mmol/L); severe anemia (hematocrit <15%); renal failure (urine output <12 ml/kg/24 hours and a serum creatinine >265 µmol/l)*

- Were the index test results interpreted without knowledge of the results of the reference standard? Yes
- Were the index test results collected prospectively? Yes
- Were the index test results established and reported using standardized clinical procedures and data collection tools? Yes
- If a threshold was used was it pre-specified? Yes

**Could the conduct or interpretation of the index test have introduced bias?**

**RISK:LOW**

### D. Concerns regarding applicability

**Is there concern that the index test, its conduct, or interpretation differ from the review question? CONCERN: LOW**

## Domain 3: Reference standard

### A. Risk of bias

*Describe the reference standard and how it was conducted and interpreted:*

*Any reported death was considered to be a reference standard*

- Is the reference standard likely to correctly classify the target condition? Yes
- Were the reference standard results interpreted without knowledge of the results of the index test? Yes

**Could the reference standard, its conduct, or its interpretation have introduced bias?**

### B. Concerns regarding applicability

**RISK: LOW**

**Is there concern that the target condition as defined by the reference standard does not match the review question? CONCERN: LOW**

## Domain 4: Flow and timing

### A. Risk of bias

*Describe any patients who did not receive the index test(s) and/or reference standard or who were excluded from the 2x2 table (refer to flow diagram):*

NR

*Describe the time interval and any interventions between index test(s) and reference standard:*

NR

- Was there an appropriate interval between index test(s) and reference standard? Yes
- Did all patients receive a reference standard? Yes
- Did patients receive the same reference standard? Yes
- Were all patients included in the analysis? Yes

**Could the patient flow have introduced bias?**

**RISK: LOW**



**Domain 1: Patient selection**

**A. Risk of bias**

*Describe methods of patient selection:*

*Children with P.falciparum malaria*

- Was a consecutive or random sample of patients enrolled? Yes
- Was a case-control design avoided? Yes
- Did the study avoid inappropriate exclusions? Yes

**Could the selection of patients have introduced bias?**

Yes

**B. Concerns regarding applicability**

**RISK: LOW**

*Describe included patients (prior testing, presentation, intended use of index test and setting):*

*See above*

**Is there concern that the included patients do not match the review question?**

**CONCERN: HIGH**

**Domain 2a: Clinical index tests**

**A. Risk of bias**

*Describe the index test and how it was conducted and interpreted:*

*Coma: BCS $\leq$ 2; prostration: unable to breastfeed or to sit or stand up or to walk, depending on age*

- Were the index test results interpreted without knowledge of the results of the reference standard? Yes
- Were the index test results collected prospectively? Yes
- Were the index test results established and reported using standardized clinical procedures and data collection tools? Yes

**Could the conduct or interpretation of the index test have introduced bias?**

**RISK: LOW**

**B. Concerns regarding applicability**

**Is there concern that the index test, its conduct, or interpretation differ from the review question?**

**CONCERN: LOW**

**Domain 2b: Laboratory index tests**

**A. Risk of bias**

*Describe the index test and how it was conducted and interpreted:*

*Severe anaemia: Hg 5g/L or hematocrit<15%; hypoglycemia: blood glucose>2.2 mmol/L*

- Were the index test results interpreted without knowledge of the results of the reference standard? Yes
- Were the index test results collected prospectively? Yes
- Were the index test results established and reported using standardized clinical procedures and data collection tools? Yes

- If a threshold was used was it pre-specified? Yes

**Could the conduct or interpretation of the index test have introduced bias? RISK:LOW**

**B. Concerns regarding applicability**

**Is there concern that the index test, its conduct, or interpretation differ from the review question? CONCERN: LOW**

**Domain 3: Reference standard**

**A. Risk of bias**

*Describe the reference standard and how it was conducted and interpreted:*

*Any reported death was considered to be a reference standard*

- Is the reference standard likely to correctly classify the target condition? Yes
- Were the reference standard results interpreted without knowledge of the results of the index test? Yes

**Could the reference standard, its conduct, or its interpretation have introduced bias? RISK: LOW**

**B. Concerns regarding applicability**

**Is there concern that the target condition as defined by the reference standard does not match the review question? CONCERN: LOW**

**Domain 4: Flow and timing**

*Describe any patients who did not receive the index test(s) and/or reference standard or who were excluded from the 2x2 table (refer to flow diagram):*

*32% of patients without lactate measurement*

*Describe the time interval and any interventions between index test(s) and reference standard:*

*19 h median time to death*

**Risk of bias**

- Was there an appropriate interval between index test(s) and reference standard? Yes
- Did all patients receive a reference standard? Yes
- Did patients receive the same reference standard? Yes
- Were all patients included in the analysis? No

**Could the patients flow have introduced bias? RISK: HIGH**
